# Supplementary material for: Structures of TGF-β with betaglycan and signaling receptors reveal mechanisms of complex assembly and signaling
Source: Springer Nature journal article supplement (doi:10.1038/s41467-025-56796-9), 2025-02-26
Supplement: MOESM1 [file 41467_2025_56796_MOESM1_ESM.pdf]

## Supplementary Information

### **Structures of TGF- $\beta$ with betaglycan and signaling receptors reveal mechanisms of complex assembly and signaling**

Łukasz Wieteska<sup>1,2,3</sup>, Alexander B. Taylor<sup>4</sup>, Emma Punch<sup>5</sup>, Jonathan A. Coleman<sup>1</sup>, Isabella O. Conway<sup>1</sup>, Yeu-Farn Lin<sup>6</sup>, Chang-Hyeock Byeon<sup>1</sup>, Cynthia S. Hinck<sup>1</sup>, Troy Krzysiak<sup>1</sup>, Rieko Ishima<sup>1</sup>, Fernando López-Casillas<sup>7</sup>, Peter Cherepanov<sup>5</sup>, Daniel J. Bernard<sup>6</sup>, Caroline S. Hill<sup>3,\*</sup> and Andrew P. Hinck<sup>1,\*</sup>

<sup>1</sup>Department of Structural Biology, University of Pittsburgh, Pittsburgh, PA, USA

<sup>2</sup>Faculty of Biological Sciences, Astbury Centre for Structural Studies, University of Leeds, Leeds, UK

<sup>3</sup>Developmental Signalling Laboratory, The Francis Crick Institute, London NW1 1AT, UK

<sup>4</sup>Department of Biochemistry & Structural Biology and Greehey Children's Cancer Research Institute, The University of Texas Health Science Center at San Antonio, TX, USA

<sup>5</sup>Chromatin Structure and Mobile DNA Laboratory, The Francis Crick Institute, London NW1 1AT, UK

<sup>6</sup>Department of Pharmacology and Therapeutics, McGill University, Montreal, QC, Canada

<sup>7</sup>Departamento de Biología Celular y del Desarrollo, Instituto de Fisiología Celular, UNAM, Mexico City, Mexico

\*Corresponding Authors:

Prof. Andrew P. Hinck, Department of Structural Biology, University of Pittsburgh School of Medicine, Biomedical Science Tower 3, Room 2051, 3501 Fifth Avenue, Pittsburgh, PA 15260, U.S.A, Telephone: +1(412) 648-8533, E-mail: [ahinck@pitt.edu](mailto:ahinck@pitt.edu)

Caroline S. Hill, Developmental Signalling Laboratory, The Francis Crick Institute, London NW1 1AT, UK, Telephone: +44 (0)20 3796 1251, E-mail: [caroline.hill@crick.ac.uk](mailto:caroline.hill@crick.ac.uk)

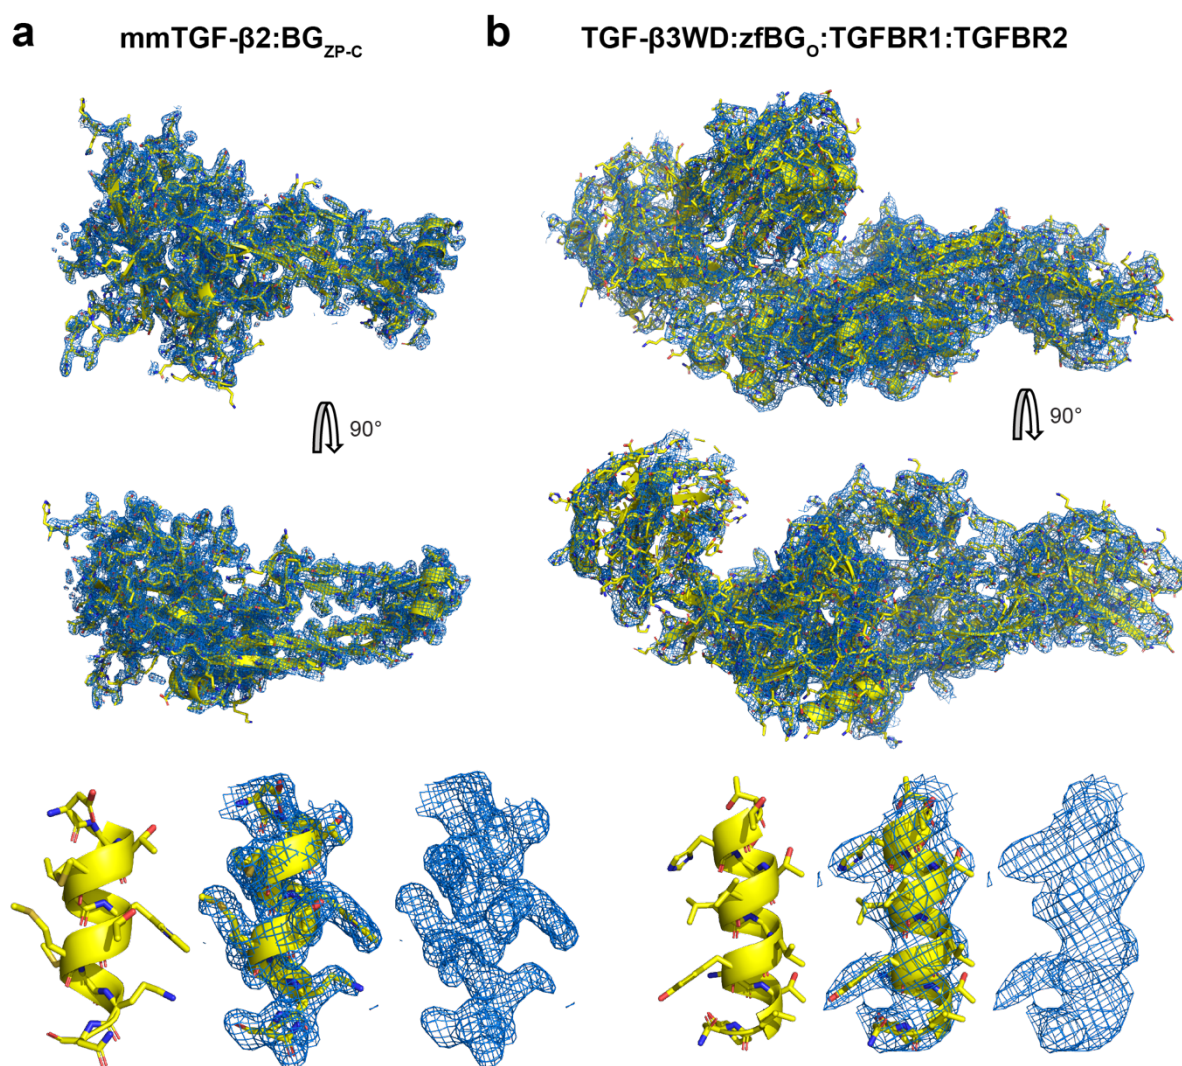

**Supplementary Figure 1. Electron density maps of the presented structures.**

(a, b) 2Fo-Fc electron density maps for mmTGF- $\beta$ 2:BG<sub>ZP-C</sub> (a) and TGF- $\beta$ 3WD:zfBG<sub>O</sub>:TGFBR1:TGFBR2 (b) contoured at 1.0  $\sigma$ , are displayed as blue mesh representations with a carve distance of 2 Å around the atomic model. Zoomed-in views highlight the quality of the electron density surrounding the FG-helix (a) or the heel helix (b).

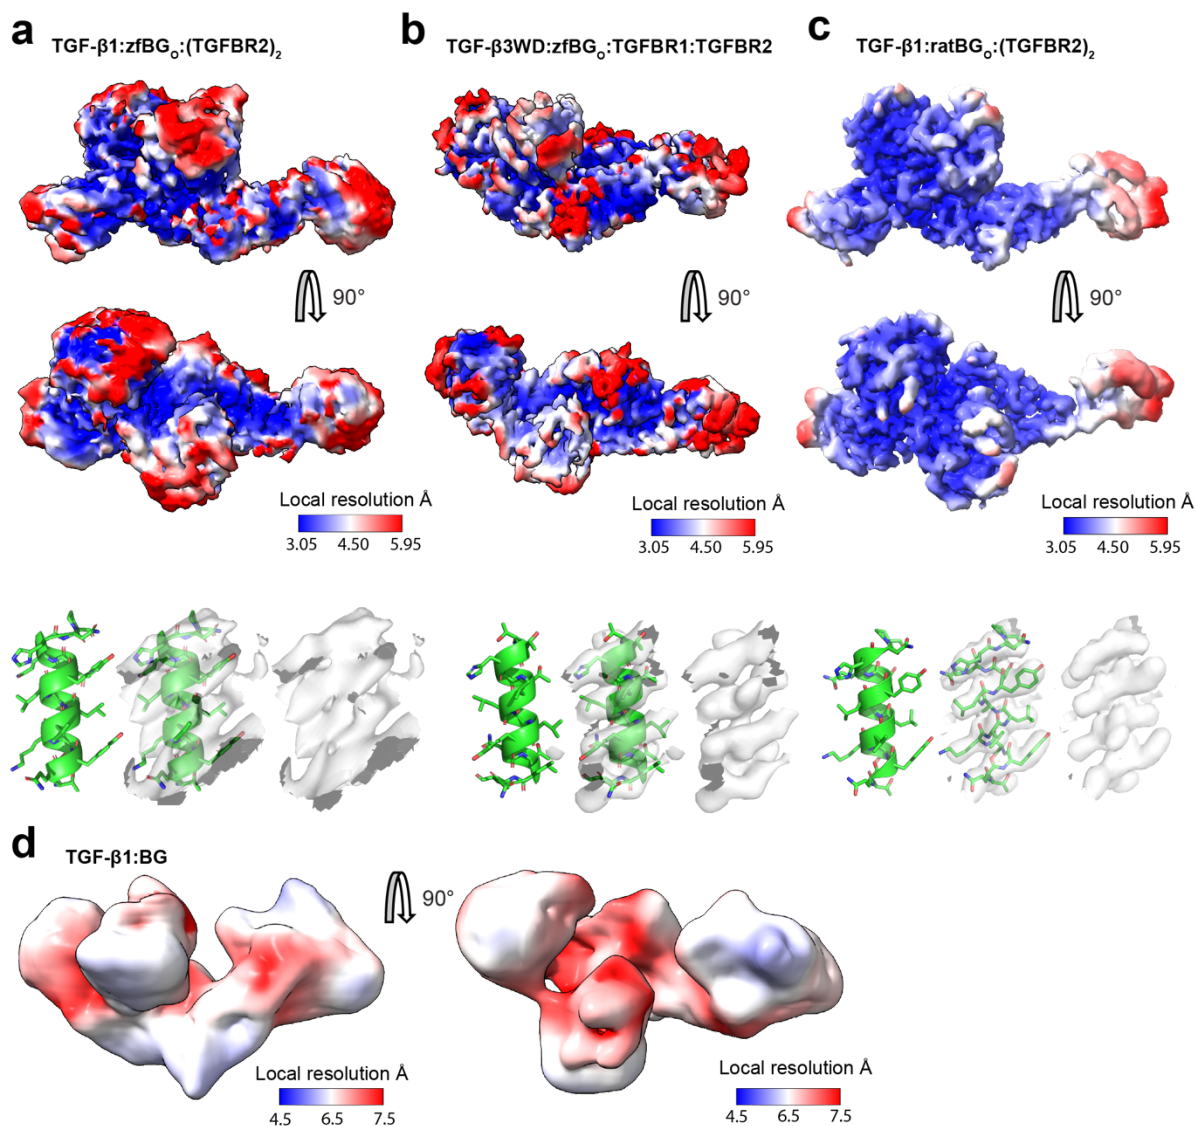

**Supplementary Figure 2. Cryo-EM maps colored by local resolution.**

(a - d) Cryo-EM maps colored by local resolution for the following complexes: TGF- $\beta$ 1:zfBG<sub>O</sub>:(TGFR2)<sub>2</sub> (a), TGF- $\beta$ 3WD:zfBG<sub>O</sub>:TGFR1:TGFR2 (b), TGF- $\beta$ 1:ratBG<sub>O</sub>:(TGFR2)<sub>2</sub> (c) and TGF- $\beta$ 1:BG (d). For (a - c), corresponding zoomed-in panels highlight the density of the heel helix of the TGF- $\beta$  monomer adjacent to that bound to BG<sub>O</sub>.

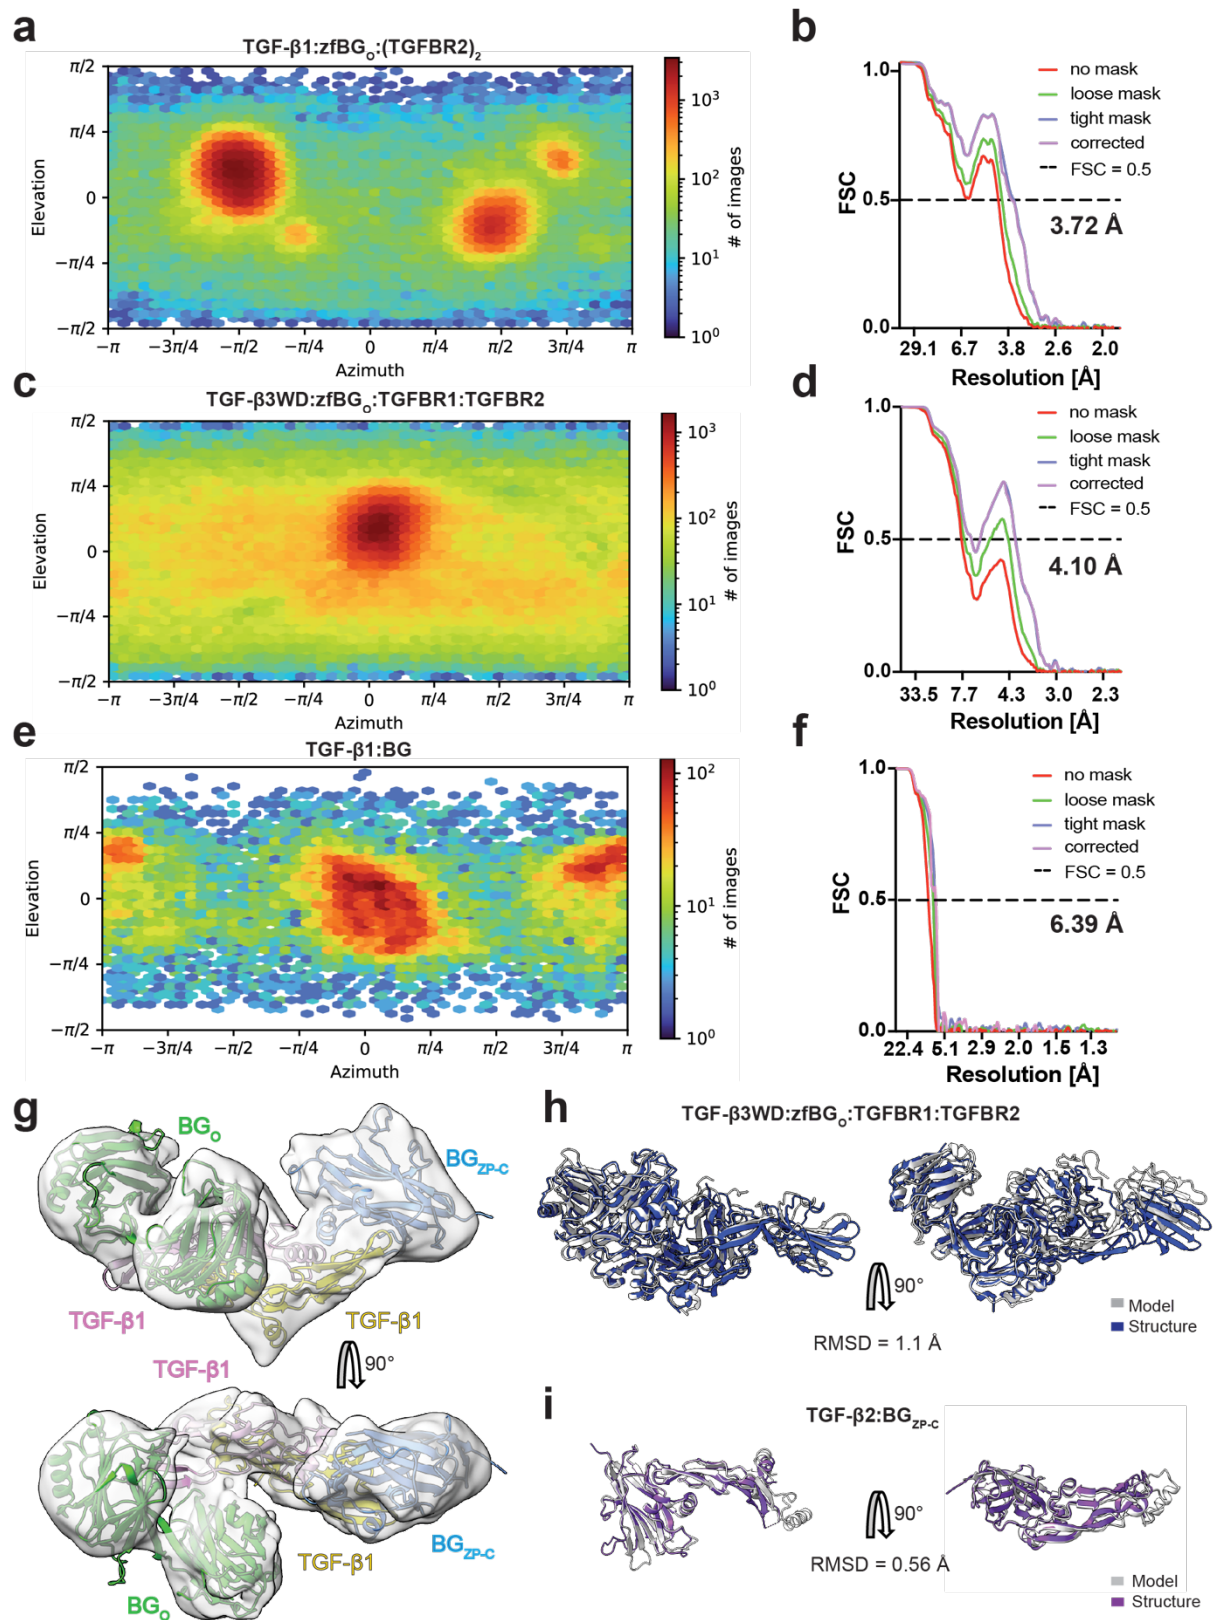



**Supplementary Figure 3. Structural details of the Cryo-EM complexes and AF2M models.**

(a - f) Particle view distributions for presented 3D reconstructions of TGF- $\beta$ 1:zfBG<sub>O</sub>:(TGFB<sub>R</sub>2)<sub>2</sub> (a), TGF- $\beta$ 3WD:zfBG<sub>O</sub>:TGFB<sub>R</sub>1:TGFB<sub>R</sub>2 (c), or TGF- $\beta$ 1:BG (e), together with Fourier Shell Correlation (FSC) curves (b, d, f, respectively).

(g) Low resolution Cryo-EM map of the TGF- $\beta$ :BG complex with fitted model to the density.

(h, i) AF2M models of TGF- $\beta$ 3WD:BG<sub>O</sub>:TGFB<sub>R</sub>1:TGFB<sub>R</sub>2 (h) and TGF- $\beta$ 2:BG<sub>ZP-C</sub> (i). The complexes are overlaid with crystal structures of TGF- $\beta$ 3WD:zfBG<sub>O</sub>:TGFB<sub>R</sub>1:TGFB<sub>R</sub>2 and mmTGF- $\beta$ 2:BG<sub>ZP-C</sub>, respectively.

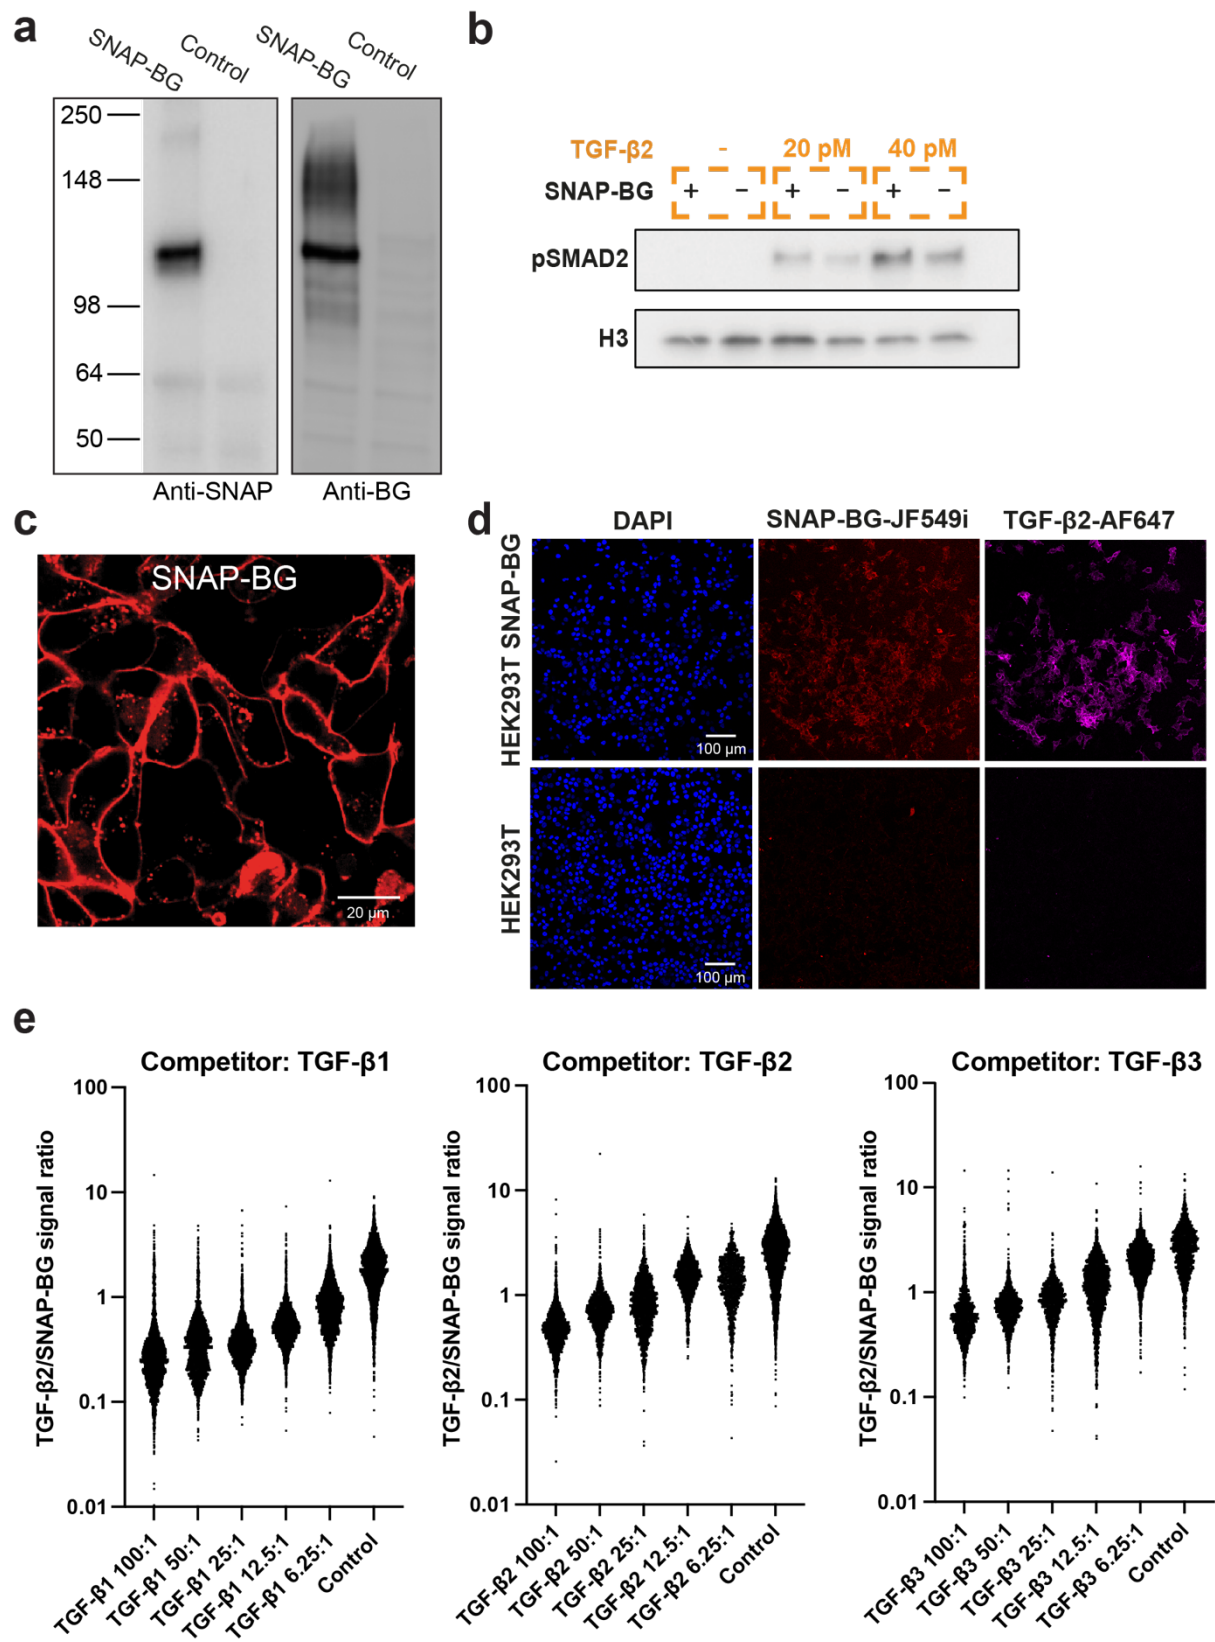

#### **Supplementary Figure 4. Characterization of SNAP-betaglycan (SNAP-BG) in HEK293T cells.**

(a) Western blot analysis of SNAP-BG expression in stably transfected HEK293T cells with pCDNA3.1 plasmid harbouring SNAP-BG. Proteins were resolved by SDS-PAGE and probed with an antibody specific to the SNAP-tag (left panel) or BG (right panel). A distinct band is observed at approximately 120 kDa, consistent with the expected molecular weight of the  $\Delta$ GAG SNAP-BG fusion protein. Additionally, diffuse signal above 120 kDa likely reflects the presence of highly glycosylated population. The anti-BG antibody does not detect low levels of endogenous protein in these cells.

(b) Western blot analysis of L6E9 cell lysate demonstrates a dose-dependent increase in phosphorylated SMAD2 (pSMAD2) levels in the cells transfected with SNAP-BG upon stimulation with TGF- $\beta$ 2. Histone H3 acts as a loading control.

(c) SNAP-BG is membrane localized. Confocal microscopy images showing SNAP-BG conjugated with a fluorescent ligand (shown in red), predominantly localized on the cell membrane. Scale bar, 20  $\mu$ m.

(d) Confocal microscopy images of HEK293T cells stably transfected with a SNAP-tagged BG construct (upper row) or untransfected control cells (bottom row) stained with DAPI to detect the nuclei (left panels, blue), SNAP-tag ligand conjugated to the JF549i fluorescent dye (middle panels, red), along with TGF- $\beta$ 2 tagged with AF647 fluorescent dye (right panels, violet). Control, untransfected cells present no signal either from SNAP-BG or TGF- $\beta$ 2. Scale bar, 100  $\mu$ m.

(e) Concentration-dependent effects of TGF- $\beta$ s as competitors in the binding assay. As the concentration of each TGF- $\beta$  isoform increases (TGF- $\beta$ 1, TGF- $\beta$ 2, TGF- $\beta$ 3), there is a corresponding decrease in the colocalization signal ratio of TGF- $\beta$ 2-CF640R/SNAP-BG, indicating assay sensitivity to ligand concentration. Each data point represents the ratio of SNAP-BG signal to InhA signal within a segmented region of the image generated by applying the Otsu thresholding method to the SNAP-BG channel. The analysis was performed on three images per condition, each corresponding to an independent biological replicate (n=3).

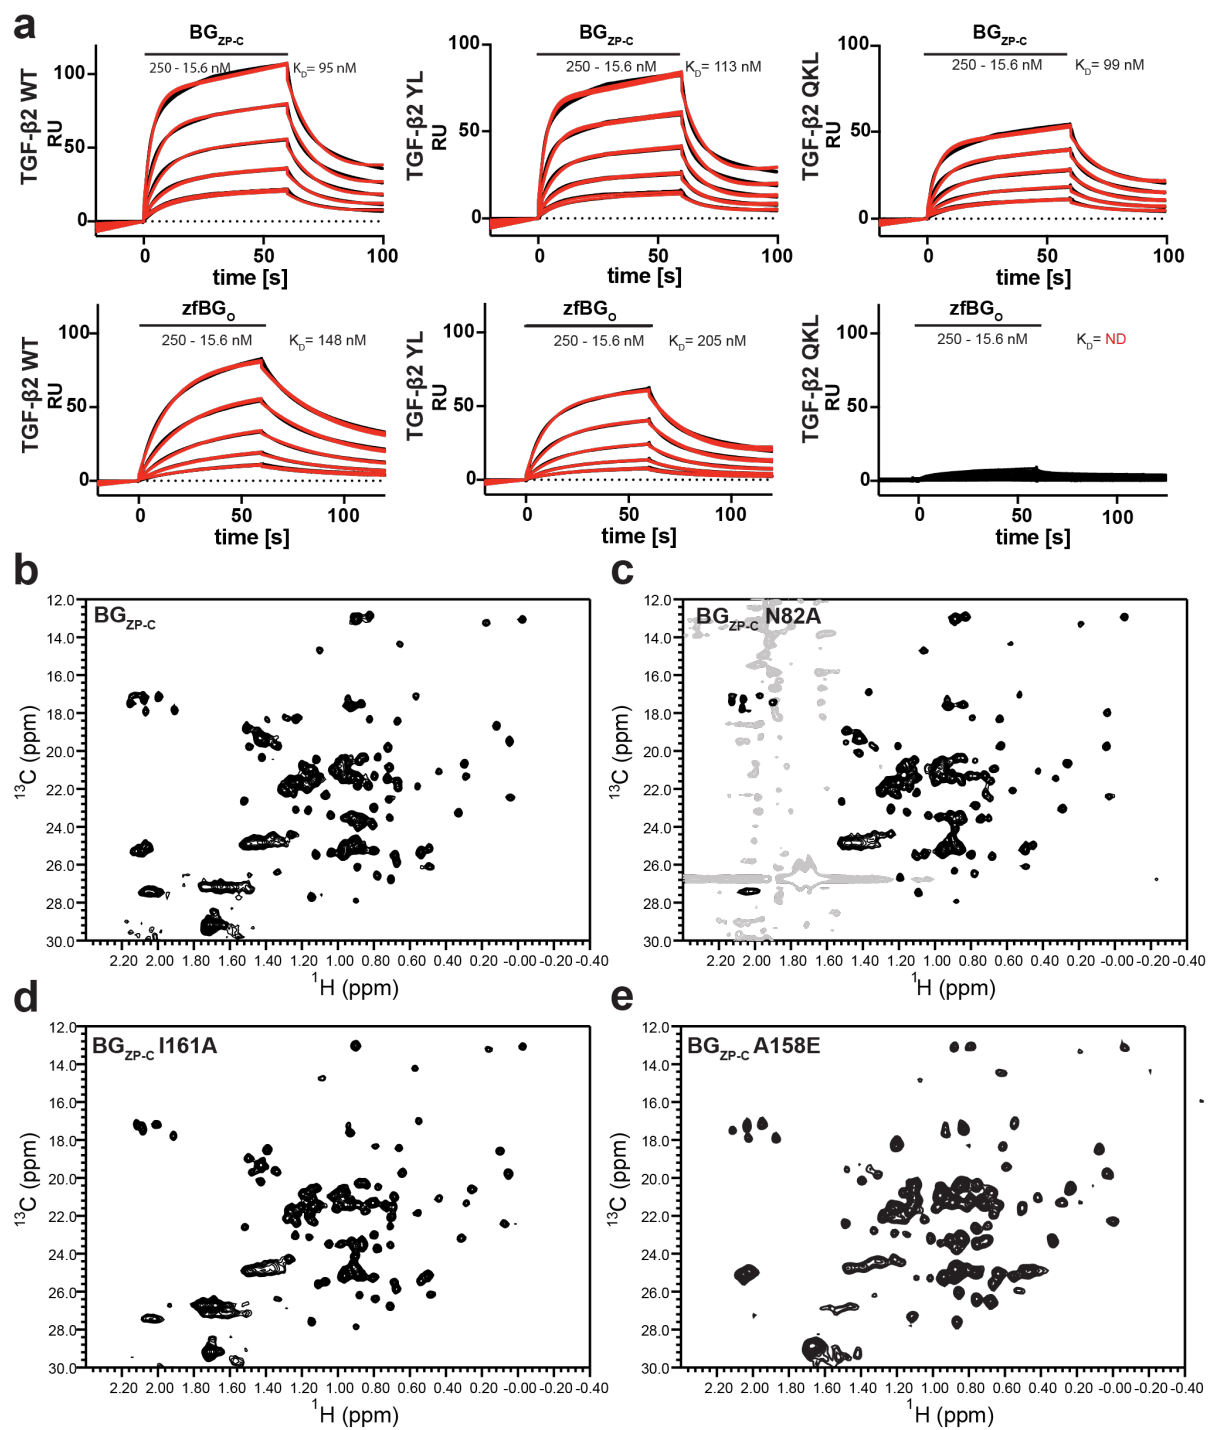



**Supplementary Figure 5. Mutations affecting TGF- $\beta$ 2 binding cause only local structural changes.**

(a) Sensorgrams from SPR experiment where zfBG<sub>O</sub> WT or a BG<sub>ZP-C</sub> WT 2-fold dilution series (black) were injected over immobilized TGF- $\beta$ 2 WT, TGF- $\beta$ 2 (Y50A, L51A located in pre-helix extension), or TGF- $\beta$ 2 (Q57A, K60A, L64A located on heel helix). zfBG<sub>O</sub> binding was severely affected only by mutations in the heel helix, while the binding of BG<sub>ZP-C</sub> was mostly unaffected. Fitting curves (red) were generated based on three consecutive repeats.

(b - e) Natural abundance methyl  $^1\text{H}$ - $^{13}\text{C}$  correlation NMR spectra indicating minimal perturbations in the chemical environment of binding affecting mutants of BG<sub>ZP-C</sub>, indicating that the mutations lead to localized structural alterations rather than a widespread change in conformation.

**a**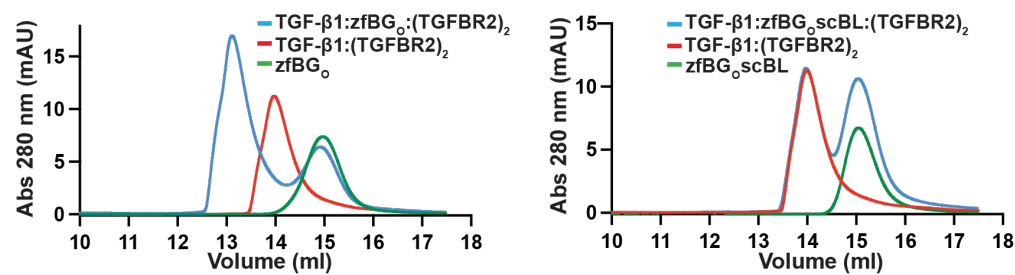**b**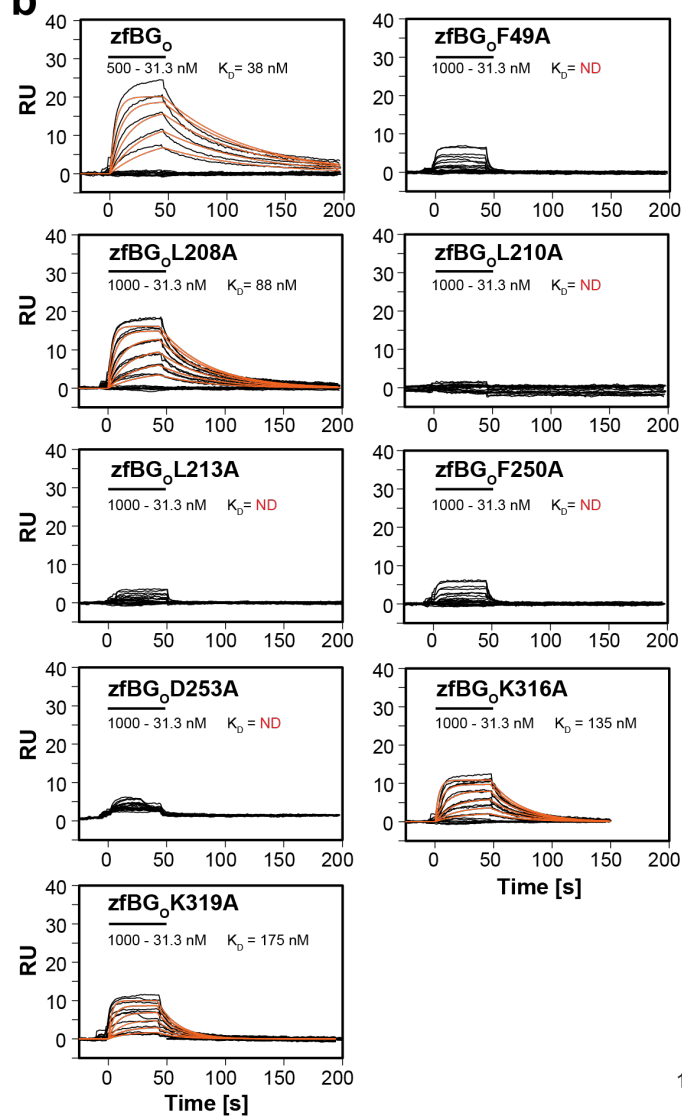**c**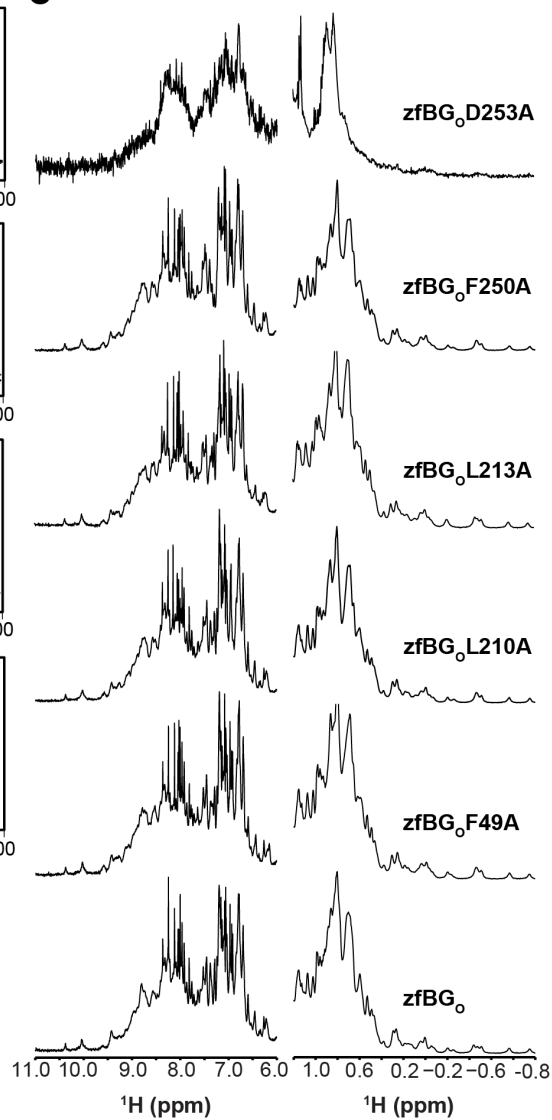

**Supplementary Figure 6. zfBG<sub>O</sub> mutations within the TGF- $\beta$ :zfBG<sub>O</sub> binding interface.**

(a) SEC profiles of TGF- $\beta$ 1:zfBG<sub>O</sub>:(TGFBR2)<sub>2</sub> and TGF- $\beta$ 1:(TGFBR2)<sub>2</sub> complexes (left panel) or TGF- $\beta$ 1:zfBG<sub>O</sub>scBL:(TGFBR2)<sub>2</sub> and TGF- $\beta$ 1:(TGFBR2)<sub>2</sub> complexes (right panel), where zfBG<sub>O</sub>scBL corresponds to zfBG<sub>O</sub> with BL fully replaced with unrelated sequence (scrambled). No shift in the TGF- $\beta$ 1:zfBG<sub>O</sub>scBL:(TGFBR2)<sub>2</sub> elution volume together with the presence of second peak eluted at the BG<sub>O</sub> volume is indicative of zfBG<sub>O</sub>scBL not forming a complex with TGF- $\beta$ 1:(TGFBR2)<sub>2</sub>.

(b) SPR sensorgrams of zfBG<sub>O</sub> mutants injected in a 2-fold dilution series (black) show binding to immobilized TGF- $\beta$ 2. Fitting curves (red) were derived from data collected in two consecutive repeats.

(c) 1D proton NMR spectra, covering both the amide and methyl spectral regions. The spectra underscore that mutations predominantly result in localized alterations to the binding interface, without extensive perturbation of the overall protein structure. Notably, the D253A mutant exhibits signal broadening across the spectra, hinting at more widespread structural changes that may suggest alterations in protein folding.

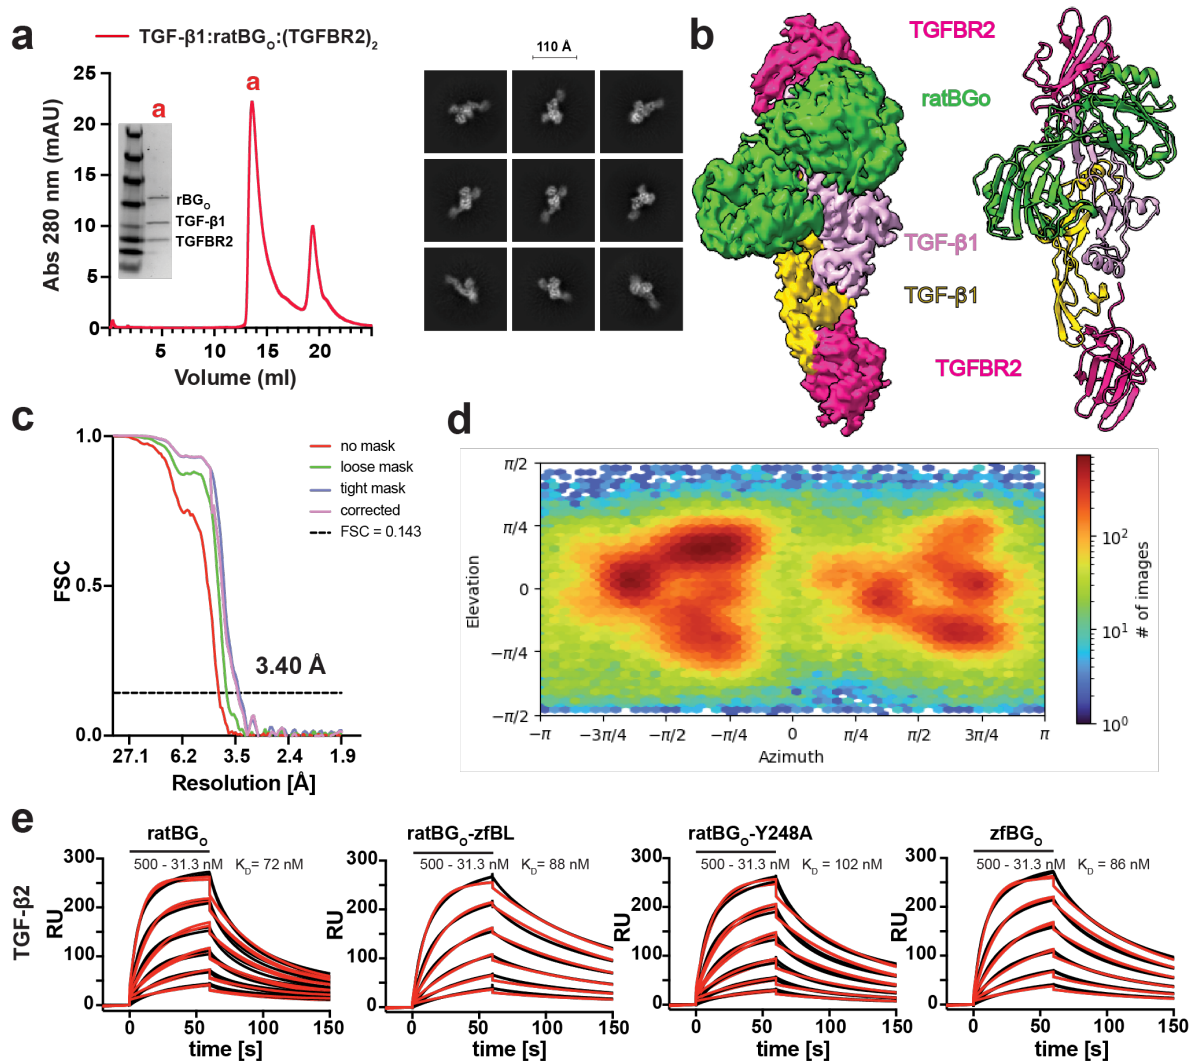

**Supplementary Figure 7. Structural details of the TGF-β1:ratBG<sub>0</sub>:(TGFB2)<sub>2</sub> complex and SPR validation of the ratBG<sub>0</sub> mutants binding to TGF-β.**

(a) SEC purification profile of TGF-β1:ratBG<sub>0</sub>:(TGFB2)<sub>2</sub> demonstrates distinct peak of assembled complex (red), as assessed by SDS-PAGE (inset). Selected 2D classes provide an overview of the dataset quality and coverage of different views. Scale bar, 110 Å.

(b) Cryo-EM map with a model built into the density (PDB: 9FDY).

(c, d) FSC curve of the final map refinement (c) with particle view distribution (d).

(e) SPR sensorgrams showing response to a 2-fold dilution series of injections (black) of ratBG<sub>0</sub>, zfBG<sub>0</sub>, as well as two mutants, ratBG<sub>0</sub>zfBL and ratBG<sub>0</sub>-Y248A, over immobilized TGF-β2 on the chip surface. Fitting curves (red) were derived from data collected in three consecutive repeats.



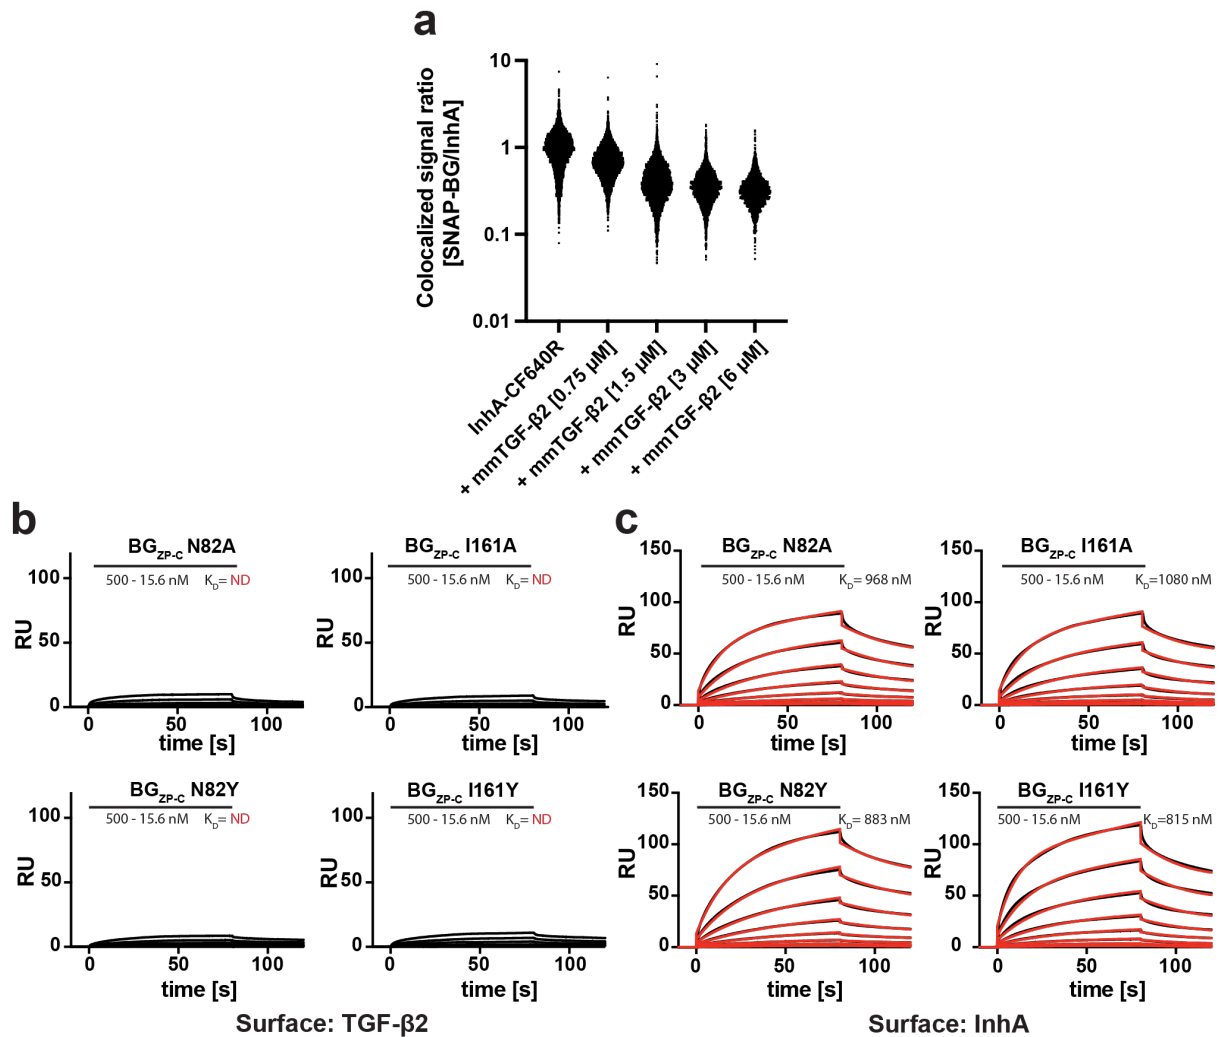

**Supplementary Figure 8. InHA binds BG<sub>ZP-C</sub> using a different but overlapping interface to the TGF-βs.**

(a) Quantification of the concentration-dependent effect of mmTGF-β2 on InHA-CF640R signal strength. Each data point represents the SNAP-BG signal to InHA signal ratio within a segmented region of the image. The analysis was performed on three images, each corresponding to an independent biological replicate (n=3).

(b, c) SPR sensorgrams showing response to 2-fold serial dilutions of selected mutants of BG<sub>ZP-C</sub> (black) injected over immobilized TGF-β2 (b) or InHA (c). Fitting curves (red) are derived from the data collected in three consecutive repeats.

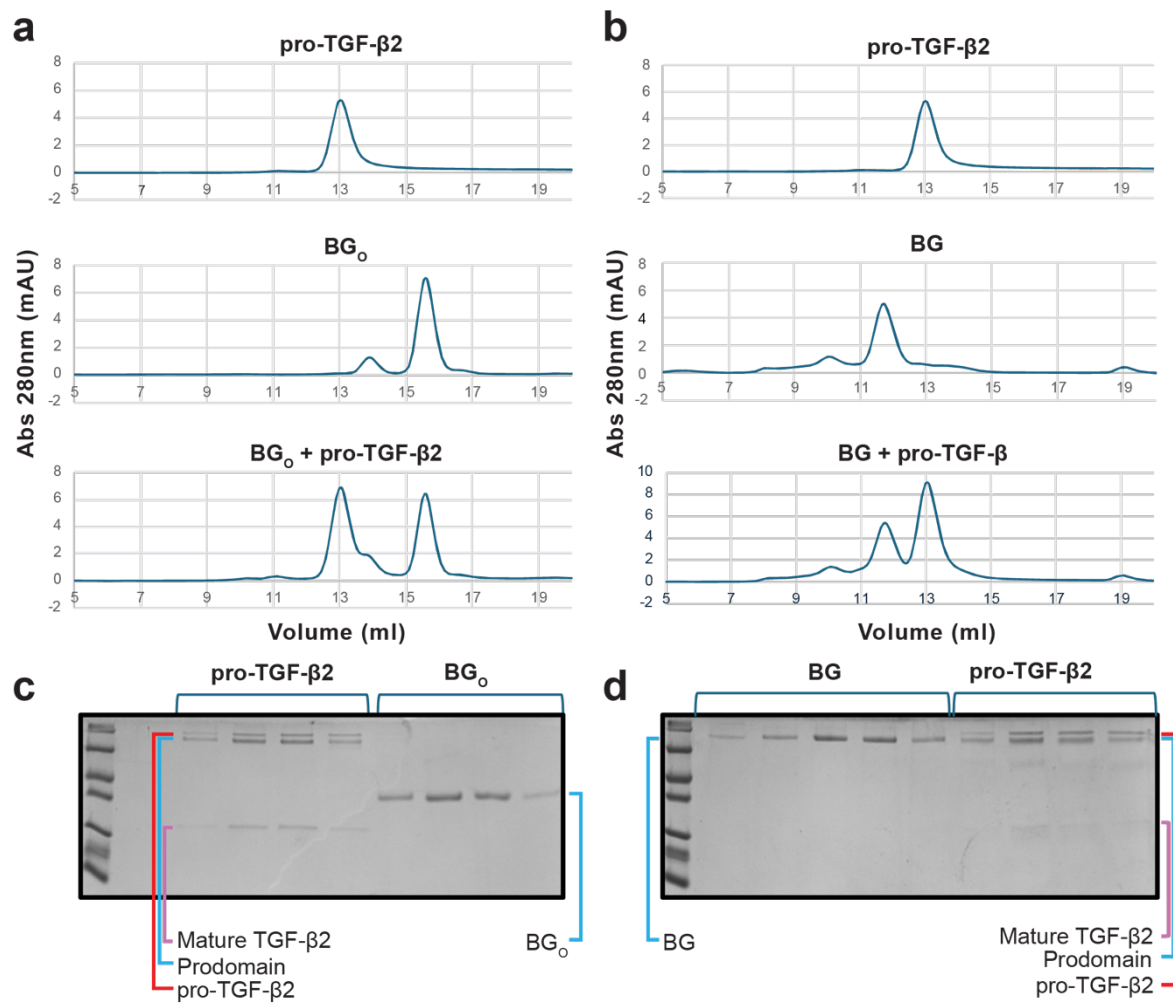

**Supplementary Figure 9. BG or isolated BG<sub>0</sub> do not form complexes with pro-TGF-β2.**

(a, c) SEC profiles of the pro-TGF-β2, BG<sub>0</sub>, or mixture of both incubated together for 30 min (a). Fractions containing proteins from the last profile were visualized by SDS-PAGE (c).

(b, d) SEC profiles of the pro-TGF-β2, BG, or mixture of both incubated together for 30 min (b). Fractions containing proteins from the last profile were visualized by SDS-PAGE (d).

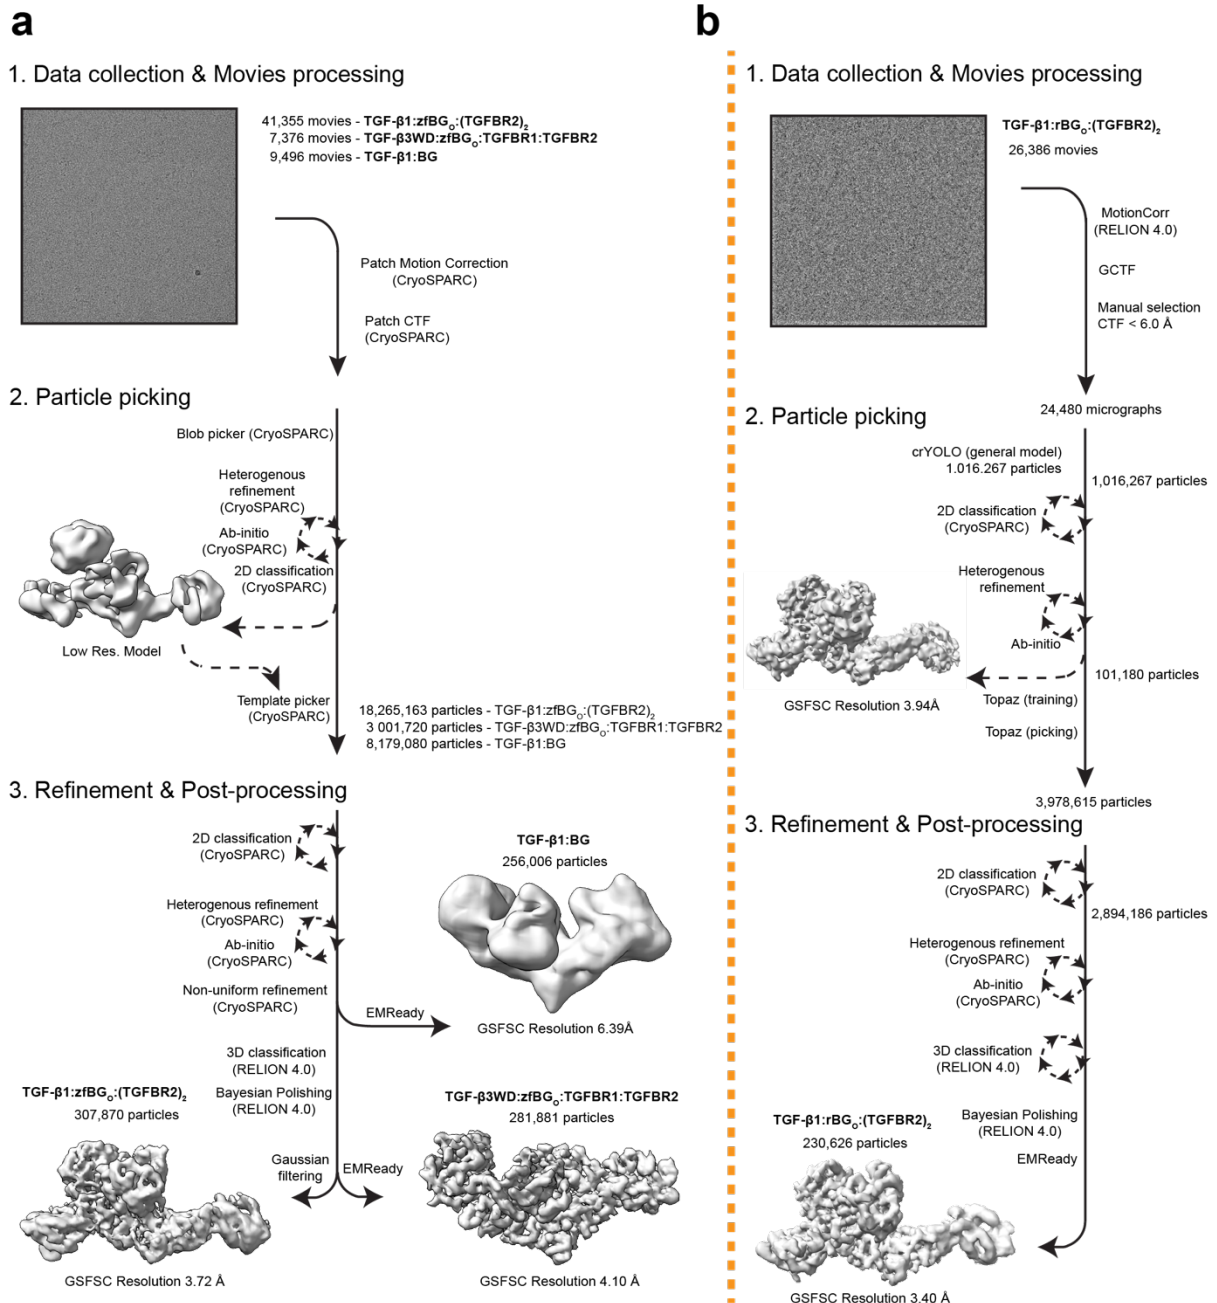

**Supplementary Figure 10. Cryo-EM data processing workflow.**

(a, b) A schematic representation of the Cryo-EM data processing pipeline of TGF- $\beta$ 1:zfBG<sub>o</sub>:(TGFBFR2)<sub>2</sub>, TGF- $\beta$ 3WD:zfBG<sub>o</sub>:TGFBFR1:TGFBR2 and TGF- $\beta$ 1:BG (a), or TGF- $\beta$ 1:rBG<sub>o</sub>:(TGFBFR2)<sub>2</sub> (b) that was collected on grids covered with graphene oxide. The workflow illustrates the steps from raw micrograph collection, particle picking, 2D classification, 3D reconstruction, refinement, post-processing and final map generation.

**Supplementary Table 1.** X-ray data collection and refinement parameters. Values in parentheses represent the highest resolution shell.

| <b>X-ray data collection</b>       |                                     |                                                 |
|------------------------------------|-------------------------------------|-------------------------------------------------|
| Specimen                           | mmTGF- $\beta$ 2:BG <sub>ZP-C</sub> | TGF- $\beta$ 3WD:BG <sub>O</sub> :TGFBR1:TGFBR2 |
| Accession code                     | PDB: 8DC0                           | PDB: 9B9F                                       |
| X-ray source                       | APS BEAMLINE 24-ID-E                | APS BEAMLINE 24-ID-C                            |
| Space group                        | <i>I</i> 222                        | <i>P</i> 2 <sub>1</sub> 2 <sub>1</sub> 2        |
| Cell Dimensions:                   |                                     |                                                 |
| <i>a</i> , <i>b</i> , <i>c</i> (Å) | 76.5, 90.5, 98.9                    | 195.1, 200.9, 47.4                              |
| $\alpha$ , $\beta$ , $\gamma$ (°)  | 90, 90, 90                          | 90, 90, 90                                      |
| Wavelength (Å)                     | 0.97918                             | 0.97918                                         |
| Resolution range (Å)               | 66.74-1.93 (2.03-1.93)              | 139.98-3.0 (3.16-3.0)                           |
| Unique reflections                 | 26,132 (3,763)                      | 38,615 (5,562)                                  |
| Multiplicity                       | 13.0 (13.1)                         | 13.4 (13.9)                                     |
| Completeness (%)                   | 100 (99.9)                          | 100 (100)                                       |
| Mean <i>I</i> / $\sigma$ <i>I</i>  | 9.3 (1.0)                           | 10.5 (0.6)                                      |
| R <sub>pim</sub> ( <i>I</i> )      | 0.052 (0.967)                       | 0.045 (1.43)                                    |
| CC <sub>1/2</sub>                  | 0.99 (0.41)                         | 0.99 (0.41)                                     |
| <b>Refinement</b>                  |                                     |                                                 |
| Reflections used in refinement     | 26,107                              | 38,508                                          |
| Reflections used for R-free        | 1,998                               | 2,011                                           |
| R-work                             | 0.219                               | 0.235                                           |
| R-free                             | 0.257                               | 0.278                                           |
| Number of non-hydrogen atoms:      |                                     |                                                 |
| Proteins                           | 2,046                               | 11,078                                          |
| Water                              | 85                                  | 0                                               |
| Ramachandran favored (%)           | 96.39                               | 93.34                                           |
| Ramachandran allowed (%)           | 3.61                                | 6.66                                            |
| Ramachandran outliers (%)          | 0.00                                | 0.00                                            |
| Rotamer outliers (%)               | 1.28                                | 1.09                                            |
| Clashscore                         | 7.88                                | 9.29                                            |
| Average B-factor                   | 54.87                               | 156.18                                          |



| <b>Supplementary Table 2.</b> Cryo-EM data collection and refinement parameters |                                                  |                                                    |                   |                                                     |
|---------------------------------------------------------------------------------|--------------------------------------------------|----------------------------------------------------|-------------------|-----------------------------------------------------|
| Specimen                                                                        | TGF- $\beta$ 3WD:<br>zfBGo:<br>TGfBR1:<br>TGfBR2 | TGF- $\beta$ 1:<br>zfBGo:<br>(TGfBR2) <sub>2</sub> | TGF- $\beta$ 1:BG | TGF- $\beta$ 1:<br>ratBGo:<br>(TGfBR2) <sub>2</sub> |
| Accession code                                                                  | EMD-50519<br>PDB: 9FK5                           | EMD-50524<br>PDB: 9FKP                             | EMD-50326         | EMD-50333<br>PDB: 9FDY                              |
| <b>Data collection</b>                                                          |                                                  |                                                    |                   |                                                     |
| Magnification                                                                   | 168675 x                                         | 194444 x                                           | 168675 x          | 152009 x                                            |
| Voltage                                                                         | 300                                              | 300                                                | 300               | 300                                                 |
| Electron exposure (e-/Å <sup>2</sup> )                                          | 50                                               | 50                                                 | 55                | 50                                                  |
| Defocus range (μm)                                                              | -0.75 to -2.25                                   | -0.75 to -2.25                                     | -0.75 to -2.25    | -1.5 to -3.5                                        |
| Pixel size                                                                      | 0.83                                             | 0.72                                               | 0.83              | 0.921                                               |
| Symmetry imposed                                                                | C1                                               | C1                                                 | C1                | C1                                                  |
| Initial particle images                                                         | 3 001 720                                        | 18 265 163                                         | 8 179 080         | 3 978 615                                           |
| Final particle images                                                           | 281 881                                          | 307 870                                            | 256 006           | 230 626                                             |
| Map resolution (Å)                                                              | 4.10                                             | 3.72                                               | 6.39              | 3.40                                                |
| cFAR                                                                            | 0.05                                             | 0.01                                               | 0.36              | 0.4                                                 |
| SCF                                                                             | 0.89                                             | 0.42                                               | 0.97              | 0.80                                                |
| FSC threshold                                                                   | 0.5                                              | 0.5                                                | 0.5               | 0.143                                               |
| <b>Refinement</b>                                                               |                                                  |                                                    |                   |                                                     |
| Map sharpening B factor (Å <sup>2</sup> )                                       | 99.9                                             | 63.5                                               | 457               | 172.1                                               |
| Chains                                                                          | 5                                                | 5                                                  | 3                 | 5                                                   |
| Non-hydrogen atoms                                                              | 5766                                             | 6093                                               | NA                | 6120                                                |
| Protein residues                                                                | 735                                              | 769                                                | NA                | 770                                                 |
| Ligands                                                                         | 0                                                | 0                                                  | 0                 | 0                                                   |
| <b>Validation</b>                                                               |                                                  |                                                    |                   |                                                     |
| - MolProbity score                                                              | 2.03                                             | 1.86                                               | NA                | 2.13                                                |
| - Clashcore                                                                     | 7.29                                             | 7.06                                               | NA                | 9.26                                                |
| - Poor rotamers (%)                                                             | 2.25%                                            | 1.86%                                              | NA                | 2.56%                                               |
| <b>Ramachandran plot</b>                                                        |                                                  |                                                    |                   |                                                     |
| - Favored                                                                       | 94.76%                                           | 96.05%                                             | NA                | 95.39%                                              |
| - Allowed                                                                       | 5.24%                                            | 3.95%                                              | NA                | 4.61%                                               |
| - Disallowed                                                                    | 0.00%                                            | 0.00%                                              | NA                | 0.00%                                               |

| <b>Supplementary Table 3: Key resources</b>                            |                           |                                   |
|------------------------------------------------------------------------|---------------------------|-----------------------------------|
| REAGENT                                                                | SOURCE                    | IDENTIFIER                        |
| <b>Antibodies</b>                                                      |                           |                                   |
| Anti-phospho-Smad2 (IF, Dilution: 1 in 500)                            | Cell Signaling Technology | Cat# 3108;<br>RRID: AB_490941     |
| Anti-SNAP-tag (Polyclonal, Dilution 1:1000)                            | Invitrogen                | Cat# CAB4255<br>RRID: AB_10710011 |
| Anti-Betaglycan (Polyclonal, Dilution 1:1000)                          | R&D                       | Cat#AF5034<br>RRID: AB_2202608    |
| HRP-conjugated anti-rabbit secondary antibodies (IF, Dilution: 1:5000) | Dako                      | Cat# P0448<br>RRID: AB_2617138    |
| HRP-conjugated anti-goat secondary antibodies (IF, Dilution: 1:5000)   | Dako                      | Cat# P0449,<br>RRID:AB_2617143    |
| <b>Bacterial strains</b>                                               |                           |                                   |
| <i>E. coli</i> BL21(DE3)                                               | EMD-Milipore              | Cat# 69450-3                      |
| <b>Chemicals, peptides, and recombinant proteins</b>                   |                           |                                   |
| Alexa Fluor™ 647 NHS ester                                             | ThermoFisher Scientific   | Cat# A20006                       |
| CF®640R Succinimide ester                                              | Biotium                   | Cat# 92108                        |
| CF®568 Succinimide ester                                               | Biotium                   | Cat# 92131                        |
| BG-NH <sub>2</sub> O6-(4-Aminomethyl-benzyl)guanine                    | AAT Bioquest              | Cat# 1256-AAT                     |
| DAPI                                                                   | Sigma                     | Cat# 10236276001                  |
| Recombinant BMP2                                                       | R&D systems               | Cat# 355-BM-100/CF                |
| Recombinant BMP4                                                       | R&D systems               | Cat# 314-BP-050/CF                |
| Recombinant Activin A                                                  | R&D systems               | Cat# 338-AC-050/CF                |
| Recombinant Inhibin A                                                  | R&D systems               | Cat# 8506-AB-010/CF               |
| Recombinant TGF-β1                                                     | This study                |                                   |

|                                                              |                         |                  |
|--------------------------------------------------------------|-------------------------|------------------|
| Recombinant TGF- $\beta$ 2                                   | This study              |                  |
| Recombinant TGF- $\beta$ 3                                   | This study              |                  |
| Recombinant TGF- $\beta$ 3WD                                 | This study              |                  |
| Recombinant TGFBR2                                           | This study              |                  |
| Recombinant TGFBR1                                           | This study              |                  |
| Recombinant BG                                               | This study              |                  |
| Recombinant ratBG <sub>ZP-C</sub> (wilde type + all mutants) | This study              |                  |
| Recombinant ratBG <sub>O</sub> (wilde type + all mutants)    | This study              |                  |
| Recombinant zfBG <sub>O</sub> (wilde type + all mutants)     | This study              |                  |
| Paraformaldehyde solution 4% in PBS                          | ThermoFisher Scientific | Cat# J19943-K2   |
| ProLong <sup>TM</sup> antifade reagent                       | Invitrogen              | Cat# P36930      |
| EDC                                                          | Pierce                  | Cat# PG82079     |
| EZ-Link Amine-PEG3-Biotin                                    | ThermoFisher Scientific | Cat# 21347       |
| Sulfo-NHS (N-hydroxysulfosuccinimide)                        | Pierce                  | Cat# PG82071     |
| DMSO                                                         | Sigma                   | Cat# D1435       |
| Amine Coupling Kit                                           | Cytiva                  | Cat# BR100050    |
| IPTG                                                         | Goldbio                 | Cat# I2481C      |
| Poly-L-Lysine                                                | Cultrex                 | Cat# 3438-100-01 |
| FuGene® HD                                                   | Promega                 | Cat# E2311       |
| ExpiFectamine <sup>TM</sup> 293 Transfection Kit             | Gibco                   | Cat# A14525      |
| Lipofectamine 3000                                           | ThermoFisher Scientific | Cat# L3000015    |
| Fetal Bovine Serum                                           | ThermoFisher Scientific | Cat# 10270-106   |

|                                                                        |                         |                 |
|------------------------------------------------------------------------|-------------------------|-----------------|
| DMEM                                                                   | ThermoFisher Scientific | Cat# 41966029   |
| FreeStyle™ 293 Expression Medium                                       | Gibco                   | Cat# 12338-018  |
| Penicillin-Streptomycin                                                | ThermoFisher Scientific | Cat# 15140122   |
| NeXtal PEGs II Suite                                                   | Molecular Dimensions    | Cat#130916      |
| Graphene Oxide                                                         | Sigma                   | Cat# 763705     |
| MES                                                                    | Sigma                   | Cat# M5287      |
| HEPES                                                                  | Sigma                   | Cat# H3375      |
| Tris-HCl                                                               | ThermoFisher Scientific | Cat# 15506017   |
| Sodium acetate                                                         | Sigma                   | Cat# S8750      |
| NaCl                                                                   | Sigma                   | Cat# S7653      |
| Glutathione reduced                                                    | Sigma                   | Cat# G6013      |
| Glutathione oxidized                                                   | Sigma                   | Cat# G4376      |
| CHAPS                                                                  | Goldbio                 | Cat# C-080-1    |
| DTT                                                                    | Sigma                   | Cat# D9779      |
| Acetic acid, glacial                                                   | Fisher Scientific       | Cat# 10304980   |
| Isopropanol                                                            | Fisher Scientific       | Cat# 10315720   |
| Acetonitrile                                                           | Fisher Scientific       | Cat# 10407440   |
| <b>Deposited Data</b>                                                  |                         |                 |
| X-ray structure of complex:<br>mmTGF-β2:BG <sub>ZP-C</sub>             | PDB, this study         | 8DC0            |
| X-ray structure of complex:<br>TGF-β3WD: BG <sub>O</sub> :TGFB1:TGFBR2 | PDB, this study         | 9B9F            |
| Cryo-EM map of complex:<br>TGF-β3WD: BG <sub>O</sub> :TGFB1:TGFBR2     | PDB, this study         | 9FK5, EMD-50519 |



|                                                                                                   |                                             |                 |
|---------------------------------------------------------------------------------------------------|---------------------------------------------|-----------------|
| Cryo-EM map of complex:<br>TGF- $\beta$ 1:BG <sub>O</sub> :(TGFB <sub>R</sub> 2) <sub>2</sub>     | PDB, this study                             | 9FKP, EMD-50326 |
| Cryo-EM map of complex:<br>TGF- $\beta$ 1: ratBG <sub>O</sub> :(TGFB <sub>R</sub> 2) <sub>2</sub> | PDB, this study                             | 9FDY, EMD-50333 |
| Cryo-EM map of complex:<br>TGF- $\beta$ 1:BG                                                      | PDB, this study                             | EMD-50326       |
| <b>Experimental models: Cell Lines</b>                                                            |                                             |                 |
| HEK293T                                                                                           | Francis Crick<br>Institute Cell<br>Services | N/A             |
| Expi293F                                                                                          | Invitrogen                                  | Cat# A14527     |
| L6E9                                                                                              | Ref <sup>1</sup>                            | N/A             |
| HEK293T SNAP-BG                                                                                   | This study                                  | N/A             |
| <b>Recombinant DNA</b>                                                                            |                                             |                 |
| <i>pCDNA3.1+-SNAP-BG</i>                                                                          | This study                                  | N/A             |
| <i>pCDNA3.1+-BG</i>                                                                               | Ref <sup>2</sup>                            | N/A             |
| <i>pCDNA3.1+-zfBG<sub>O</sub></i>                                                                 | Ref <sup>3</sup>                            | N/A             |
| <i>pCDNA3.1+-ratBG<sub>O</sub></i>                                                                | Ref <sup>2</sup>                            | N/A             |
| <i>pCDNA3.1+-ratBG<sub>O</sub>-zfBL</i>                                                           | This study                                  | N/A             |
| <i>pCDNA3.1+-ratBG<sub>O</sub>-Y248A</i>                                                          | This study                                  | N/A             |
| <i>pCDNA3.1+-zfBG<sub>O</sub>-scBL</i>                                                            | This study                                  | N/A             |
| <i>pCDNA3.1+-ratBG<sub>O</sub>-F49A</i>                                                           | This study                                  | N/A             |
| <i>pCDNA3.1+-ratBG<sub>O</sub>-L208A</i>                                                          | This study                                  | N/A             |
| <i>pCDNA3.1+-ratBG<sub>O</sub>-L210A</i>                                                          | This study                                  | N/A             |
| <i>pCDNA3.1+-ratBG<sub>O</sub>-L213A</i>                                                          | This study                                  | N/A             |
| <i>pCDNA3.1+-ratBG<sub>O</sub>-F250A</i>                                                          | This study                                  | N/A             |
| <i>pCDNA3.1+-ratBG<sub>O</sub>-D253A</i>                                                          | This study                                  | N/A             |
| <i>pCDNA3.1+-ratBG<sub>O</sub>-K316A</i>                                                          | This study                                  | N/A             |

|                                                                         |                  |     |
|-------------------------------------------------------------------------|------------------|-----|
| <i>pCDNA3.1+-ratBG<sub>O</sub>-K319A</i>                                | This study       | N/A |
| <i>pCDNA3.1+-ratBG<sub>O</sub>-zfBL</i>                                 | This study       | N/A |
| <i>pCDNA3.1+-ALB-BG<sub>ZP-C</sub></i>                                  | Ref <sup>4</sup> | N/A |
| <i>pCDNA3.1+-ALB-BG<sub>ZP-C</sub>-N82A</i>                             | This study       | N/A |
| <i>pCDNA3.1+-ALB-BG<sub>ZP-C</sub>-N82Y</i>                             | This study       | N/A |
| <i>pCDNA3.1+-ALB-BG<sub>ZP-C</sub>-K86A</i>                             | This study       | N/A |
| <i>pCDNA3.1+-ALB-BG<sub>ZP-C</sub>-D88A</i>                             | This study       | N/A |
| <i>pCDNA3.1+-ALB-BG<sub>ZP-C</sub>-E130A</i>                            | This study       | N/A |
| <i>pCDNA3.1+-ALB-BG<sub>ZP-C</sub>-L143A</i>                            | This study       | N/A |
| <i>pCDNA3.1+-ALB-BG<sub>ZP-C</sub>-S155A</i>                            | This study       | N/A |
| <i>pCDNA3.1+-ALB-BG<sub>ZP-C</sub>-A158A</i>                            | This study       | N/A |
| <i>pCDNA3.1+-ALB-BG<sub>ZP-C</sub>-A158E</i>                            | This study       | N/A |
| <i>pCDNA3.1+-ALB-BG<sub>ZP-C</sub>-I161A</i>                            | This study       | N/A |
| <i>pCDNA3.1+-ALB-BG<sub>ZP-C</sub>-I161Y</i>                            | This study       | N/A |
| <i>pCDNA3.1+-ALB-BG<sub>ZP-C</sub>-W162A</i>                            | This study       | N/A |
| <i>pCDNA3.1+-ALB-BG<sub>ZP-C</sub>-M164A</i>                            | This study       | N/A |
| <i>pCDNA3.1+-ALB-BG<sub>ZP-C</sub>-W162A/M164A</i>                      | This study       | N/A |
| <i>pCDNA3.1+-ALB-BG<sub>ZP-C</sub>-Q166A</i>                            | This study       | N/A |
| <i>pCDNA3.1+-proTGF-<math>\beta</math>1</i>                             | Ref <sup>5</sup> | N/A |
| <i>pCDNA3.1+-proTGF-<math>\beta</math>2</i>                             | This study       | N/A |
| <i>pCDNA3.1+-proTGF-<math>\beta</math>2-(E99K, L101Y, S102Q, N103D)</i> | This study       | N/A |
| <i>pCDNA3.1+-proTGF-<math>\beta</math>2-(E99K, S102Q, N103D)</i>        | This study       | N/A |
| <i>pCDNA3.1+-proTGF-<math>\beta</math>2-(E99K, S102Q)</i>               | This study       | N/A |
| <i>pCDNA3.1+-proTGF-<math>\beta</math>2-(S102Q, N103D)</i>              | This study       | N/A |
| <i>pET32a-TGF-<math>\beta</math>2</i>                                   | Ref <sup>4</sup> | N/A |
| <i>pET32a-TGF-<math>\beta</math>2-(Q57A, K60A, L64A)</i>                | This study       | N/A |
| <i>pET32a-TGF-<math>\beta</math>2-(Y50A, L51A)</i>                      | This study       | N/A |
| <i>pET32a-TGF-<math>\beta</math>3</i>                                   | Ref <sup>6</sup> | N/A |

|                                              |                   |                                                                                                                                                                           |
|----------------------------------------------|-------------------|---------------------------------------------------------------------------------------------------------------------------------------------------------------------------|
| <i>pET32a-TGF-β3D</i>                        | Ref <sup>5</sup>  | N/A                                                                                                                                                                       |
| <i>pET32a-mmTGF-β27M</i>                     | Ref <sup>7</sup>  | N/A                                                                                                                                                                       |
| <i>pET32a-BG<sub>ZP-C</sub></i>              | Ref <sup>2</sup>  | N/A                                                                                                                                                                       |
| <i>pET32a-TGFBR1(31-115)</i>                 | Ref <sup>6</sup>  | N/A                                                                                                                                                                       |
| <i>pET32a-TGFBR2(42-153)</i>                 | Ref <sup>6</sup>  | N/A                                                                                                                                                                       |
| <i>pCMV5-BG<sub>ZP-C</sub></i>               | Ref <sup>1</sup>  | N/A                                                                                                                                                                       |
| <i>pCMV5-BG<sub>ZP-C</sub>-(N82A)</i>        | This study        | N/A                                                                                                                                                                       |
| <i>pCMV5-BG<sub>ZP-C</sub>-(I161A)</i>       | This study        | N/A                                                                                                                                                                       |
| <i>pCMV5-BG<sub>ZP-C</sub>-(N82A, I161A)</i> | This study        | N/A                                                                                                                                                                       |
| <i>CAGA<sub>12</sub>-luciferase</i>          | Ref <sup>8</sup>  | N/A                                                                                                                                                                       |
| <b>Software</b>                              |                   |                                                                                                                                                                           |
| FIJI (ImageJ)                                | Ref <sup>9</sup>  | <a href="https://imagej.net/Fiji/Downloads">https://imagej.net/Fiji/Downloads</a>                                                                                         |
| Prism 10                                     | Graph Pad         | <a href="https://www.graphpad.com/scientific-software/prism/">https://www.graphpad.com/scientific-software/prism/</a>                                                     |
| TopSpin 4.0                                  | Bruker Biospin    | <a href="https://www.bruker.com/en/products-and-solutions/mr/nmr-software/topspin.html">https://www.bruker.com/en/products-and-solutions/mr/nmr-software/topspin.html</a> |
| NMRPipe                                      | Ref <sup>10</sup> | <a href="https://www.ibbr.umd.edu/nmrpipe/install.html">https://www.ibbr.umd.edu/nmrpipe/install.html</a>                                                                 |
| CCPNMR                                       | Ref <sup>11</sup> | <a href="https://ccpn.ac.uk/software/downloads/">https://ccpn.ac.uk/software/downloads/</a>                                                                               |
| CCP4 8.0                                     | Ref <sup>12</sup> | <a href="https://www.ccp4.ac.uk/download/">https://www.ccp4.ac.uk/download/</a>                                                                                           |
| Phenix 1.21                                  | Ref <sup>13</sup> | <a href="https://phenix-online.org/download/">https://phenix-online.org/download/</a>                                                                                     |
| autoPROC                                     | Ref <sup>14</sup> | <a href="https://www.globalphasing.com/autoproc/">https://www.globalphasing.com/autoproc/</a>                                                                             |
| PHASER                                       | Ref <sup>15</sup> | <a href="https://www.phaser.cimr.cam.ac.uk/index.php/Phaser_Crystallographic_Software">https://www.phaser.cimr.cam.ac.uk/index.php/Phaser_Crystallographic_Software</a>   |

|                  |                       |                                                                                                                           |
|------------------|-----------------------|---------------------------------------------------------------------------------------------------------------------------|
| Pointless        | Refs <sup>16,17</sup> | <a href="https://www.ccp4.ac.uk/html/pointless.html">https://www.ccp4.ac.uk/html/pointless.html</a>                       |
| Aimless          | Refs <sup>16,17</sup> | <a href="https://www.ccp4.ac.uk/html/aimless.html">https://www.ccp4.ac.uk/html/aimless.html</a>                           |
| Ctruncate        | Refs <sup>16,17</sup> | <a href="https://www.ccp4.ac.uk/html/ctruncate.html">https://www.ccp4.ac.uk/html/ctruncate.html</a>                       |
| XDS              | Ref <sup>18</sup>     | <a href="https://wiki.uni-konstanz.de/xds/index.php/Main_Page">https://wiki.uni-konstanz.de/xds/index.php/Main_Page</a>   |
| Coot             | Ref <sup>19</sup>     | <a href="https://www2.mrc-lmb.cam.ac.uk/personal/pemsley/coot/">https://www2.mrc-lmb.cam.ac.uk/personal/pemsley/coot/</a> |
| ChimeraX1.6      | Ref <sup>20</sup>     | <a href="https://www.cgl.ucsf.edu/chimerax/">https://www.cgl.ucsf.edu/chimerax/</a>                                       |
| CrYOLO           | Ref <sup>21</sup>     | <a href="https://cryolo.readthedocs.io/en/stable/">https://cryolo.readthedocs.io/en/stable/</a>                           |
| Relion 4.0       | Ref <sup>22</sup>     | <a href="https://relion.readthedocs.io/en/release-4.0/">https://relion.readthedocs.io/en/release-4.0/</a>                 |
| CryoSparc        | Ref <sup>23</sup>     | <a href="https://cryosparc.com">https://cryosparc.com</a>                                                                 |
| ISOLDE           | Ref <sup>24</sup>     | <a href="https://tristanic.github.io/isolde/">https://tristanic.github.io/isolde/</a>                                     |
| MotionCor2 1.5.0 | Ref <sup>25</sup>     | <a href="https://emcore.ucsf.edu/ucsf-software">https://emcore.ucsf.edu/ucsf-software</a>                                 |
| GCTF 1.18        | Ref <sup>26</sup>     | <a href="https://sbgrid.org/software/titles/gctf">https://sbgrid.org/software/titles/gctf</a>                             |
| Namdinator       | Ref <sup>27</sup>     | <a href="https://namdinator.au.dk/namdinator/">https://namdinator.au.dk/namdinator/</a>                                   |
| AlphaFold2       | Ref <sup>28</sup>     | <a href="https://github.com/google-deepmind/alphafold">https://github.com/google-deepmind/alphafold</a>                   |
| TOPAZ            | Ref <sup>29</sup>     | <a href="https://emgweb.nysbc.org/topaz.html">https://emgweb.nysbc.org/topaz.html</a>                                     |
| PDBePISA         | Ref <sup>30</sup>     | <a href="https://www.ebi.ac.uk/pdbe/pisa/">https://www.ebi.ac.uk/pdbe/pisa/</a>                                           |
| Jalview          | Ref <sup>31</sup>     | <a href="https://www.jalview.org/">https://www.jalview.org/</a>                                                           |

|                                                         |                   |                                                                                                                                                                       |
|---------------------------------------------------------|-------------------|-----------------------------------------------------------------------------------------------------------------------------------------------------------------------|
| Clustal Omega                                           | Ref <sup>32</sup> | <a href="http://www.clustal.org/">http://www.clustal.org/</a>                                                                                                         |
| Scrubber                                                | Biologic Software | <a href="http://www.biologic.com.au/scrubber.html">http://www.biologic.com.au/scrubber.html</a>                                                                       |
| BiaEval                                                 | Biacore           | <a href="https://www.cytivalifesciences.com/en/us/support/software/biacore-downloads">https://www.cytivalifesciences.com/en/us/support/software/biacore-downloads</a> |
| <b>Other</b>                                            |                   |                                                                                                                                                                       |
| Series S CM-4 SPR sensor chip                           | Cytiva            | Cat# BR100534                                                                                                                                                         |
| Classic CM-5 SPR sensor chip                            | Cytiva            | Cat# BR100399                                                                                                                                                         |
| Superdex <sup>®</sup> 200 10/300 GL                     | Cytiva            | Cat# GE17-5175-01                                                                                                                                                     |
| HiLoad <sup>®</sup> 16/600 Superdex <sup>®</sup> 200 pg | Cytiva            | Cat# GE28-9893-35                                                                                                                                                     |
| Ni-NTA agarose                                          | Qiagen            | Cat# 30210                                                                                                                                                            |
| cOmplete <sup>™</sup> His-Tag Purification column       | Roche             | Cat# 06781535001                                                                                                                                                      |
| Mono S <sup>®</sup> 5/50 GL                             | Sigma             | Cat# GE17-5168-01                                                                                                                                                     |
| SP Sepharose                                            | Cytiva            | Cat# GE17-0729-10                                                                                                                                                     |
| UltrAuFoil R1.2/1.3                                     | Quantifoil        | Cat# TEM-Q350AR13A                                                                                                                                                    |

## Supplementary References

1. Esparza-Lopez, J. et al. Ligand binding and functional properties of betaglycan, a co-receptor of the transforming growth factor- $\beta$  superfamily. Specialized binding regions for transforming growth factor- $\beta$  and inhibin A. *J Biol Chem* **276**, 14588-96 (2001).
2. Villarreal, M.M. et al. Binding Properties of the Transforming Growth Factor- $\beta$  Coreceptor Betaglycan: Proposed Mechanism for Potentiation of Receptor Complex Assembly and Signaling. *Biochemistry* **55**, 6880-6896 (2016).
3. Kim, S.K. et al. Structural Adaptation in Its Orphan Domain Engenders Betaglycan with an Alternate Mode of Growth Factor Binding Relative to Endoglin. *Structure* **27**, 1427-1442 e4 (2019).

4. Henen, M.A. et al. TGF- $\beta$ 2 uses the concave surface of its extended finger region to bind betaglycan's ZP domain via three residues specific to TGF- $\beta$  and inhibin- $\alpha$ . *J Biol Chem* **294**, 3065-3080 (2019).
5. Huang, T., Schor, S.L. & Hinck, A.P. Biological activity differences between TGF- $\beta$ 1 and TGF- $\beta$ 3 correlate with differences in the rigidity and arrangement of their component monomers. *Biochemistry* **53**, 5737-49 (2014).
6. Groppe, J. et al. Cooperative assembly of TGF- $\beta$  superfamily signaling complexes is mediated by two disparate mechanisms and distinct modes of receptor binding. *Mol Cell* **29**, 157-68 (2008).
7. Kim, S.K. et al. An engineered transforming growth factor  $\beta$  (TGF- $\beta$ ) monomer that functions as a dominant negative to block TGF- $\beta$  signaling. *J Biol Chem* **292**, 7173-7188 (2017).
8. Dennler, S. et al. Direct binding of Smad3 and Smad4 to critical TGF  $\beta$ -inducible elements in the promoter of human plasminogen activator inhibitor-type 1 gene. *EMBO J* **17**, 3091-100 (1998).
9. Schindelin, J. et al. Fiji: an open-source platform for biological-image analysis. *Nat Methods* **9**, 676-82 (2012).
10. Delaglio, F. et al. NMRPipe: a multidimensional spectral processing system based on UNIX pipes. *J Biomol NMR* **6**, 277-93 (1995).
11. Vranken, W.F. et al. The CCPN data model for NMR spectroscopy: development of a software pipeline. *Proteins* **59**, 687-96 (2005).
12. Agirre, J. et al. The CCP4 suite: integrative software for macromolecular crystallography. *Acta Crystallogr D Struct Biol* **79**, 449-461 (2023).
13. Adams, P.D. et al. PHENIX: a comprehensive Python-based system for macromolecular structure solution. *Acta Crystallogr D Biol Crystallogr* **66**, 213-21 (2010).
14. Vonrhein, C. et al. Data processing and analysis with the autoPROC toolbox. *Acta Crystallogr D Biol Crystallogr* **67**, 293-302 (2011).
15. McCoy, A.J. et al. Phaser crystallographic software. *J Appl Crystallogr* **40**, 658-674 (2007).
16. Evans, P. Scaling and assessment of data quality. *Acta Crystallogr D Biol Crystallogr* **62**, 72-82 (2006).
17. Evans, P.R. An introduction to data reduction: space-group determination, scaling and intensity statistics. *Acta Crystallogr D Biol Crystallogr* **67**, 282-92 (2011).
18. Kabsch, W. Xds. *Acta Crystallogr D Biol Crystallogr* **66**, 125-32 (2010).
19. Emsley, P. & Cowtan, K. Coot: model-building tools for molecular graphics. *Acta Crystallogr D Biol Crystallogr* **60**, 2126-32 (2004).
20. Meng, E.C. et al. UCSF ChimeraX: Tools for structure building and analysis. *Protein Sci* **32**, e4792 (2023).
21. Wagner, T. et al. SPHIRE-crYOLO is a fast and accurate fully automated particle picker for cryo-EM. *Commun Biol* **2**, 218 (2019).
22. Kimanius, D., Dong, L., Sharov, G., Nakane, T. & Scheres, S.H.W. New tools for automated cryo-EM single-particle analysis in RELION-4.0. *Biochem J* **478**, 4169-4185 (2021).
23. Punjani, A., Rubinstein, J.L., Fleet, D.J. & Brubaker, M.A. cryoSPARC: algorithms for rapid unsupervised cryo-EM structure determination. *Nat Methods* **14**, 290-296 (2017).

24. Croll, T.I. ISOLDE: a physically realistic environment for model building into low-resolution electron-density maps. *Acta Crystallogr D Struct Biol* **74**, 519-530 (2018).
25. Zheng, S.Q. et al. MotionCor2: anisotropic correction of beam-induced motion for improved cryo-electron microscopy. *Nat Methods* **14**, 331-332 (2017).
26. Zhang, K. Gctf: Real-time CTF determination and correction. *J Struct Biol* **193**, 1-12 (2016).
27. Kidmose, R.T. et al. Namdinator - automatic molecular dynamics flexible fitting of structural models into cryo-EM and crystallography experimental maps. *IUCrJ* **6**, 526-531 (2019).
28. Jumper, J. et al. Highly accurate protein structure prediction with AlphaFold. *Nature* **596**, 583-589 (2021).
29. Bepler, T. et al. Positive-unlabeled convolutional neural networks for particle picking in cryo-electron micrographs. *Nat Methods* **16**, 1153-1160 (2019).
30. Krissinel, E. & Henrick, K. Inference of macromolecular assemblies from crystalline state. *J Mol Biol* **372**, 774-97 (2007).
31. Waterhouse, A.M., Procter, J.B., Martin, D.M., Clamp, M. & Barton, G.J. Jalview Version 2--a multiple sequence alignment editor and analysis workbench. *Bioinformatics* **25**, 1189-91 (2009).
32. Sievers, F. et al. Fast, scalable generation of high-quality protein multiple sequence alignments using Clustal Omega. *Mol Syst Biol* **7**, 539 (2011).
